# Supplementary material
Source: PubMed Central journal article supplement (PMC5738989)
Supplement: ba002295-suppl1.pdf [file ba002295-suppl1.pdf]

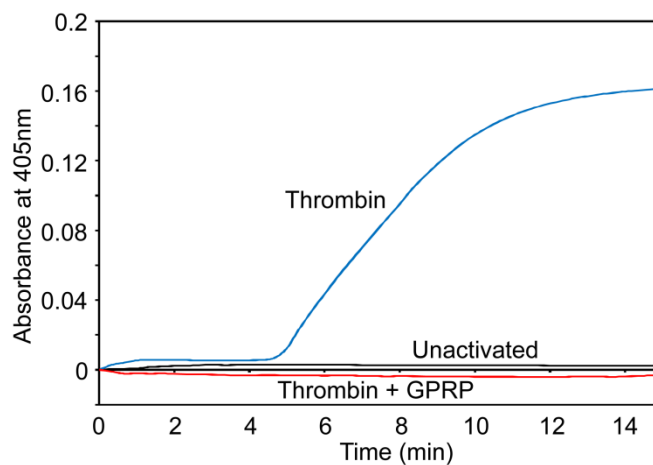

**Figure S1. Fibrin does not form in re-calcified, CTI-treated plasma in the absence of a thrombin source.** Plasma containing normal FV (20 $\mu$ L) was incubated with PC:PE:PS (4 $\mu$ M) in HBSA containing 5mM CaCl<sub>2</sub> (80 $\mu$ L), in the absence (black) or presence (blue) of thrombin (1nM), and fibrin formation was monitored by measuring absorbance at 405nm. In some reactions, the peptide Gly-Pro-Arg-Pro (GPRP, 2mM) was included to block fibrin polymerization (red).

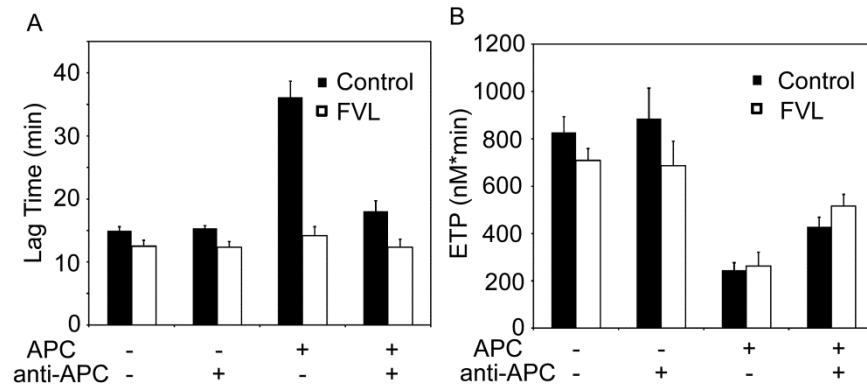

**Figure S2. APC activity is not present in this assay system.** Thrombin generation in plasma containing normal FV (black) or FVL (white), incubated with FXa (100pM) and PC:PE:PS (4 $\mu$ M), in the presence or absence of APC (5nM) and an inhibitory APC antibody (50nM). Shown are the average lag times (A) and endogenous thrombin potentials (B) (n=6).

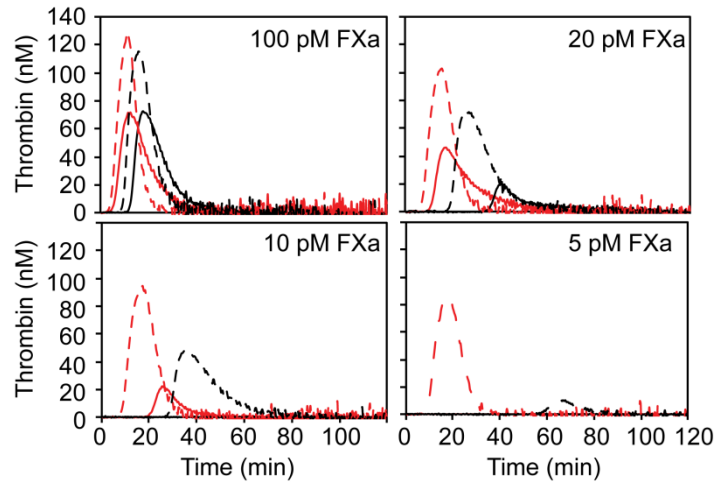

**Figure S3. TFPI controls an activation threshold for FXa-initiated thrombin generation in heterozygous FVL plasma.** Thrombin generation was initiated in plasma from individuals heterozygous for FVL, in the absence (lines) or presence (dashes) of 50nM anti-K2. Shown are thrombin generation curves from two individuals.

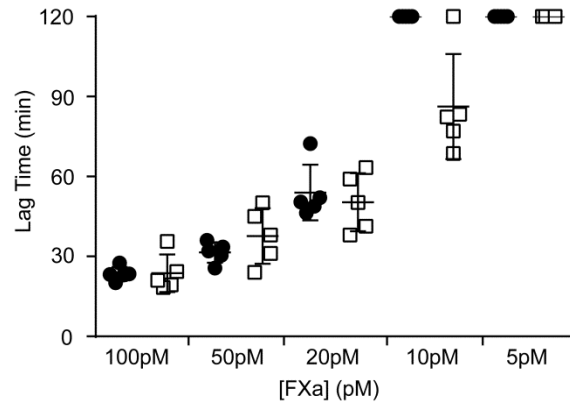

**Figure S4. FVL PRP has a lower activation threshold for thrombin generation than normal FV PRP.** Thrombin generation was measured in five normal FV (●) and five FVL (□) PRPs, initiating with varying concentrations of FXa (5-100pM). Shown are the lag times. A lag time of 120min was used for samples that did not generate detectable thrombin during the assay. The lines represent the mean  $\pm$  S.D.
